# Supplementary material for: Transcriptional Profiling of Polycythemia Vera Identifies Gene Expression Patterns Both Dependent and Independent from the Action of JAK2V617F
Source: Oxford University Press journal article supplement (doi:10.1158/1078-0432.ccr-10-1092), 2010-07-02
Supplement: 10780432ccr101092-sup-supplementary_figure_s2.pdf [file 10780432ccr101092-sup-supplementary_figure_s2.pdf]

GSM247959...  
 GSM247960...  
 GSM248113...  
 GSM248161...  
 GSM248163...  
 GSM248162...  
 GSM76926.bx...  
 GSM76927.bx...  
 GSM76928.bx...  
 JL-#B-U133A...  
 GSM248159...  
 GSM248157...  
 GSM247963...  
 GSM248160...  
 GSM247961...  
 GSM248158...  
 JL-PVK-U133...  
 GSM248011...  
 JL-PVP-U133...  
 JL-T-U133A...  
 JL-V-U133A...  
 JL-Y-U133A...  
 GSM248164...  
 GSM248167...  
 GSM247962...  
 JL-#B-U133A...  
 JL-#F-U133A...  
 JL-#E-U133A...  
 GSM35699.bx...  
 GSM35700.bx...  
 GSM35702.bx...  
 GSM35704.bx...  
 GSM35701.bx...  
 GSM35703.bx...

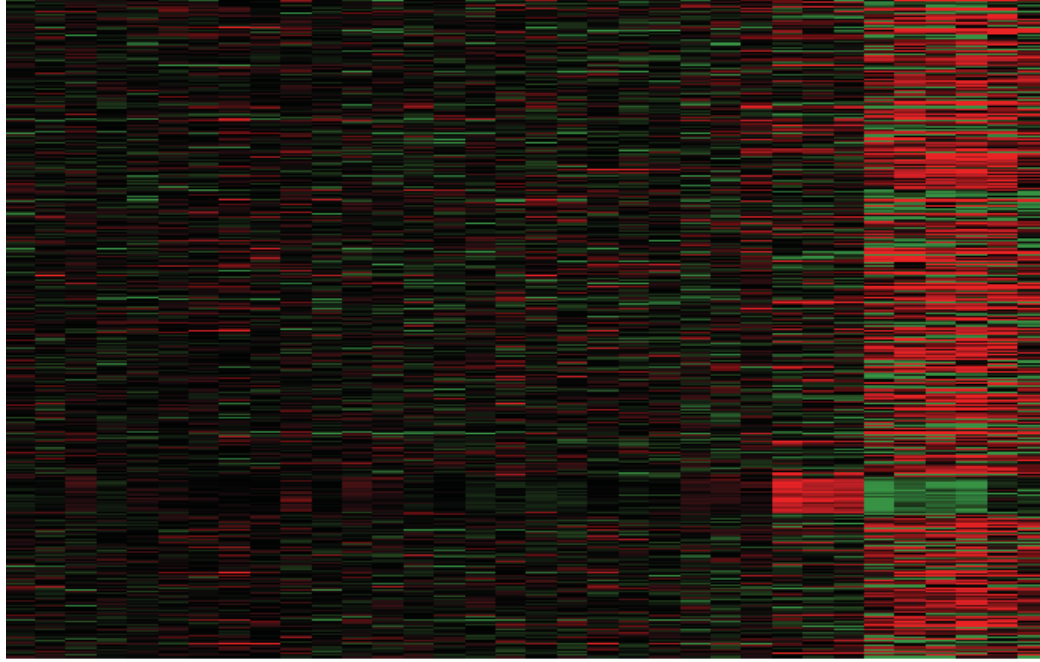

- ET CD34+
- MF CD34+
- PV CD34+
- ET Platelets

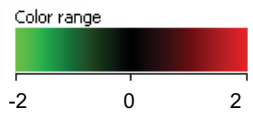

Condition
