# Supplementary material for: Transcriptional Profiling of Polycythemia Vera Identifies Gene Expression Patterns Both Dependent and Independent from the Action of JAK2V617F
Source: Oxford University Press journal article supplement (doi:10.1158/1078-0432.ccr-10-1092), 2010-07-02
Supplement: 10780432ccr101092-sup-supplementary_table_s1.xls [file 10780432ccr101092-sup-supplementary_table_s1.xls]

## Sheet: Sheet1
Patient	Time from Diagnosis to Sample	Therapy at time of sample	Comment	JAK2V617F
B	2 years	aspirin, phlebotomy		yes
E	1 month	none		yes
I	1 month	1 week of hyroxyurea	Father with PV	wild type
P	3 weeks	phlebotomy		yes
V	8 months	aspirin, phlebotomy	Aunt with PV	yes
U	6 years	aspirin, anegrilide	High plt count	yes
T	14 years	hydroxyurea, aspirin, phlebotomy, allopurinol		yes
Y	4 years	aspirin, phlebotomy		wild type
K	13 years	aspirin, phlebotomy	Father and maternal uncle with PV	yes
