# Supplementary material for: Transcriptional Profiling of Polycythemia Vera Identifies Gene Expression Patterns Both Dependent and Independent from the Action of JAK2V617F
Source: Oxford University Press journal article supplement (doi:10.1158/1078-0432.ccr-10-1092), 2010-07-02
Supplement: 10780432ccr101092-sup-supplementary_table_s3.xls [file 10780432ccr101092-sup-supplementary_table_s3.xls]

## Sheet: Sheet1
Probe Set ID	Gene Symbol	FCAbsolute	p-value
212413_at	2010-09-06	-2.16498	0.000523089
201662_s_at	ACSL3	-2.81797	0.00623107
216705_s_at	ADA	-2.29338	0.00731458
221893_s_at	ADCK2	-2.56426	0.0147375
206170_at	ADRB2	-2.36873	0.0273714
200903_s_at	AHCY	-2.45884	0.013399
212543_at	AIM1	-2.70369	0.000597594
210517_s_at	AKAP12	-3.22264	0.0493033
202759_s_at	AKAP2 /// PALM2 /// PALM2-AKAP2	-3.3885	0.04353
209699_x_at	AKR1C2	-2.23411	0.00266469
208950_s_at	ALDH7A1	-2.21518	0.00186157
204174_at	ALOX5AP	-3.63342	0.0026442
201590_x_at	ANXA2	-2.99322	0.000774416
210427_x_at	ANXA2	-2.9306	0.000618759
213503_x_at	ANXA2	-3.27561	0.000243213
200782_at	ANXA5	-3.70851	0.0097007
204859_s_at	APAF1	-2.07206	0.000155733
37577_at	ARHGAP19	-2.44318	0.00064611
202207_at	ARL4C	-7.31599	6.35136e-06
202208_s_at	ARL4C	-3.00272	0.000824532
208679_s_at	ARPC2	-2.22748	0.00258924
202672_s_at	ATF3	-2.93973	0.030431
213238_at	ATP10D	-2.65611	0.0202223
201171_at	ATP6V0E1	-3.22852	0.000919347
214149_s_at	ATP6V0E1	-2.40327	0.00615336
221504_s_at	ATP6V1H	-2.28845	2.53097e-05
212599_at	AUTS2	-2.49979	0.033825
221234_s_at	BACH2	-4.83185	0.0326611
214052_x_at	BAT2D1	-3.79411	0.00262341
210653_s_at	BCKDHB	-2.00981	0.00108267
203140_at	BCL6	-3.42763	0.000306559
202094_at	BIRC5	-2.87382	0.0293006
207655_s_at	BLNK	-3.94395	0.000584026
219806_s_at	C11orf75	-2.74724	0.00396596
219099_at	C12orf5	-2.44747	0.00305097
218723_s_at	C13orf15	-5.82183	0.000679105
44790_s_at	C13orf18 /// PPP1R2P4	-2.93764	0.0335707
217957_at	C16orf80	-2.00152	5.35796e-07
209574_s_at	C18orf1	-2.19213	0.000753336
209020_at	C20orf111	-2.10415	0.00100025
212421_at	C22orf9	-3.18104	0.0176584
209284_s_at	C3orf63	-2.05065	0.00591623
218784_s_at	C6orf64	-2.05483	0.0293786
210817_s_at	CALCOCO2	-2.17943	0.00694089
208852_s_at	CANX	-2.07556	0.00740728
209970_x_at	CASP1	-2.19678	0.0272554
222201_s_at	CASP8AP2	-3.2301	0.0258395
206978_at	CCR2	-5.47985	0.00011185
208651_x_at	CD24	-2.54088	0.0135386
209771_x_at	CD24	-3.85373	0.0221702
216379_x_at	CD24	-4.06748	0.0202337
204118_at	CD48	-3.98499	0.000147077
205173_x_at	CD58	-2.0476	0.0111301
211744_s_at	CD58	-2.04959	0.049331
215925_s_at	CD72	-2.72196	0.0299283
201028_s_at	CD99	-2.60398	0.00855372
203214_x_at	CDC2	-2.44719	0.0147496
210559_s_at	CDC2	-2.0077	0.045513
214230_at	CDC42	-2.24778	0.0193908
209714_s_at	CDKN3	-2.09651	0.00760946
219505_at	CECR1	-2.00349	0.00120828
205046_at	CENPE	-2.51581	0.0282833
218542_at	CEP55	-2.61804	0.0480182
209194_at	CETN2	-2.423	0.000161264
210563_x_at	CFLAR	-2.20709	0.00235227
210416_s_at	CHEK2	-2.00028	0.0075435
202121_s_at	CHMP2A	-2.41076	0.0138572
209763_at	CHRDL1	-2.71165	5.13277e-05
219947_at	CLEC4A	-3.2889	0.00105251
217645_at	COX16	-3.21101	0.0363705
213736_at	COX5B	-2.41244	0.0479538
201941_at	CPD	-3.74972	0.0239266
203392_s_at	CTBP1	-2.27757	0.0105289
205035_at	CTDP1	-2.50297	0.0375217
207843_x_at	CYB5A	-2.51879	0.00226893
209366_x_at	CYB5A	-2.55524	0.0052422
215726_s_at	CYB5A	-2.36538	0.01126
218774_at	DCPS	-2.17977	0.0476081
209231_s_at	DCTN5	-2.34968	0.00621987
214909_s_at	DDAH2	-2.35212	0.000975676
215537_x_at	DDAH2	-2.3678	0.00341716
213279_at	DHRS1	-2.01483	0.0400127
210788_s_at	DHRS7	-2.05313	0.00376722
201478_s_at	DKC1	-2.17066	0.00726478
210487_at	DNTT	-4.37429	0.0397295
213787_s_at	EBP	-2.97289	0.00211626
214395_x_at	EEF1D	-2.2756	0.0110109
213907_at	EEF1E1	-2.57409	0.00908057
201694_s_at	EGR1	-3.43081	0.002818
200597_at	EIF3A	-2.39474	0.020531
208756_at	EIF3I	-2.10758	0.0238835
201726_at	ELAVL1	-2.31729	0.0118358
201324_at	EMP1	-3.31503	0.00121957
201216_at	ERP29	-2.05867	0.00290954
219694_at	FAM105A	-2.447	0.00032372
204834_at	FGL2	-2.93781	0.0266714
222065_s_at	FLII	-2.30407	0.0294323
206674_at	FLT3	-2.1302	0.00157342
218618_s_at	FNDC3B	-2.91375	0.000485713
202580_x_at	FOXM1	-2.01716	0.00188372
203066_at	GALNAC4S-6ST	-4.86347	0.0230379
213772_s_at	GGA2	-2.09255	2.6376e-05
209080_x_at	GLRX3	-2.0326	0.0279854
35820_at	GM2A	-2.47377	0.0185553
204875_s_at	GMDS	-2.39854	0.00825112
218241_at	GOLGA5	-2.03992	0.0182297
209170_s_at	GPM6B	-2.31732	0.00385219
210473_s_at	GPR125	-2.1976	0.0100103
205419_at	GPR183	-4.38284	0.000470398
200678_x_at	GRN	-2.16542	0.0311114
216041_x_at	GRN	-2.4662	0.0125413
210164_at	GZMB	-2.61952	0.00459891
209069_s_at	H3F3B	-2.30639	0.00130651
211997_x_at	H3F3B	-2.7747	0.000443074
206643_at	HAL	-3.01593	0.000688557
218603_at	HECA	-2.33787	0.0419348
210997_at	HGF	-2.42912	0.0245557
213537_at	HLA-DPA1	-3.90355	0.0171449
209823_x_at	HLA-DQB1	-3.3886	0.00230387
211656_x_at	HLA-DQB1	-2.67275	0.041865
208894_at	HLA-DRA	-2.56159	0.0147893
210982_s_at	HLA-DRA	-2.473	0.0184283
209312_x_at	HLA-DRB1 /// HLA-DRB4 /// HLA-DRB5	-2.01351	0.00760314
216450_x_at	HSP90B1	-3.26212	0.00559518
208598_s_at	HUWE1	-2.26961	0.00935838
202069_s_at	IDH3A	-2.2444	0.00616201
201422_at	IFI30	-3.93035	0.00220377
212592_at	IGJ	-3.5224	0.000681743
221651_x_at	IGK@ /// IGKC	-3.40158	0.0220471
221671_x_at	IGK@ /// IGKC	-3.34584	0.00859011
205945_at	IL6R	-2.86711	0.0331158
200052_s_at	ILF2	-2.56053	4.56032e-07
208931_s_at	ILF3	-2.95162	0.014303
217805_at	ILF3	-2.36046	0.000874542
200791_s_at	IQGAP1	-2.28534	0.0114077
204057_at	IRF8	-7.34852	3.7149e-07
202803_s_at	ITGB2	-2.70677	0.00190691
221004_s_at	ITM2C	-2.14937	0.0125461
213281_at	JUN	-2.76677	0.000496873
204301_at	KBTBD11	-2.10788	0.00414725
212192_at	KCTD12	-3.51804	0.0406073
200698_at	KDELR2	-3.90798	0.00370049
212311_at	KIAA0746	-2.06189	8.16675e-07
212314_at	KIAA0746	-3.0925	0.000226552
209760_at	KIAA0922	-2.32472	0.00486027
221841_s_at	KLF4	-4.05917	6.50997e-05
208961_s_at	KLF6	-4.13175	0.000926894
217388_s_at	KYNU	-2.9803	0.0234476
221581_s_at	LAT2	-2.19516	4.04207e-05
218656_s_at	LHFP	-2.87675	0.00701892
200706_s_at	LITAF	-2.07318	0.00701168
216952_s_at	LMNB2	-2.76147	0.000249536
210596_at	LOC100129513	-2.81159	0.00281367
207856_s_at	LOC150776 /// SMPD4	-2.70253	0.0032068
201239_s_at	LOC653566 /// SPCS2	-2.51414	0.0011077
217860_at	LOC732160 /// NDUFA10	-2.58332	0.00442047
216250_s_at	LPXN	-4.34408	0.00707232
211596_s_at	LRIG1	-3.87423	0.0232101
212532_s_at	LSM12	-2.20243	0.0287446
205859_at	LY86	-10.5067	7.77046e-05
206584_at	LY96	-3.85049	0.00351134
214056_at	MCL1	-3.90639	0.00214955
214057_at	MCL1	-4.69373	3.6182e-06
211675_s_at	MDFIC	-2.07836	0.0400007
216109_at	MED13L	-2.12275	0.0451423
212020_s_at	MKI67	-2.01175	0.0236479
212021_s_at	MKI67	-2.01526	0.037668
203434_s_at	MME	-5.58235	0.0203165
204959_at	MNDA	-2.61749	0.0141063
214812_s_at	MOBKL1B	-2.22407	0.022929
203466_at	MPV17	-2.32249	0.00429964
201874_at	MPZL1	-2.1136	0.00025726
217932_at	MRPS7	-2.40598	0.0448634
219607_s_at	MS4A4A	-3.70981	0.000306739
219666_at	MS4A6A	-5.55287	0.00132862
218966_at	MYO5C	-2.22146	0.0142249
204860_s_at	NAIP	-4.44698	0.000990454
204861_s_at	NAIP	-2.00094	0.023283
205147_x_at	NCF4	-2.5019	0.0169842
209105_at	NCOA1	-2.67532	0.00353096
210555_s_at	NFATC3	-3.29063	0.0200308
207075_at	NLRP3	-3.79957	0.000261012
206023_at	NMU	-4.12993	0.00243539
201695_s_at	NP	-2.2406	0.0246235
202679_at	NPC1	-2.11227	0.00168634
213061_s_at	NTAN1	-2.20387	0.018179
222027_at	NUCKS1	-3.90144	0.00318128
212247_at	NUP205	-2.24314	0.0431098
212315_s_at	NUP210	-2.92373	0.00739619
218622_at	NUP37	-2.11359	0.0136213
202188_at	NUP93	-2.07567	0.00696369
206637_at	P2RY14	-4.84618	2.7017e-06
212825_at	PAXIP1	-2.25218	0.0135838
208620_at	PCBP1	-2.17248	0.00456378
213263_s_at	PCBP2	-2.70928	0.000863702
203708_at	PDE4B	-3.67799	0.00614153
202671_s_at	PDXK	-2.01027	0.037161
210976_s_at	PFKM	-2.1152	0.000173936
203879_at	PIK3CD	-2.13053	0.000103457
201191_at	PITPNA	-2.0113	0.0207691
201192_s_at	PITPNA	-2.10426	0.00265824
219014_at	PLAC8	-2.45694	0.00212943
204285_s_at	PMAIP1	-2.98543	0.0321717
202868_s_at	POP4	-2.46268	0.0372579
205267_at	POU2AF1	-4.2614	0.0386016
210502_s_at	PPIE	-2.08112	0.0209339
200913_at	PPM1G	-2.03302	0.00680806
204061_at	PRKX	-3.55305	0.00155099
220051_at	PRSS21	-2.32717	0.0381183
204279_at	PSMB9	-2.17116	0.00407715
201267_s_at	PSMC3	-2.08744	0.000802878
213362_at	PTPRD	-2.69511	0.0225036
214043_at	PTPRD	-2.70459	0.0241282
221840_at	PTPRE	-2.88361	0.00285496
218949_s_at	QRSL1	-2.86513	0.00346893
219681_s_at	RAB11FIP1	-2.86001	0.0114273
209515_s_at	RAB27A	-2.70699	0.0270871
208732_at	RAB2A	-2.36141	0.0213328
205590_at	RASGRP1	-2.00732	0.0183856
57540_at	RBKS	-2.0727	0.015987
208984_x_at	RBM10	-2.01913	0.00854612
215089_s_at	RBM10	-2.15399	0.00344065
217221_x_at	RBM10	-2.17975	0.00507052
203748_x_at	RBMS1	-2.37115	0.0329639
207266_x_at	RBMS1	-2.3523	0.0238229
209868_s_at	RBMS1	-3.15069	0.0224397
208370_s_at	RCAN1	-2.06414	0.036443
204730_at	RIMS3	-3.37863	0.0338577
213297_at	RMND5B	-2.89159	0.00824202
213566_at	RNASE6	-4.96568	4.40896e-05
217983_s_at	RNASET2	-2.18997	0.0180791
207624_s_at	RPGR	-2.09672	0.0420863
219138_at	RPL14	-3.71035	0.00105007
214041_x_at	RPL37A	-2.14506	0.00245244
221943_x_at	RPL38	-2.4617	0.00329261
201614_s_at	RUVBL1	-2.05613	0.0025244
200872_at	S100A10	-2.47688	0.0138938
204502_at	SAMHD1	-5.59036	9.18875e-05
218217_at	SCPEP1	-3.07913	3.81299e-05
207707_s_at	SEC13	-2.0845	0.00352957
201583_s_at	SEC23B	-2.10348	0.00397645
208941_s_at	SEPHS1	-2.10738	0.0210867
201585_s_at	SFPQ	-2.5059	1.15426e-06
209091_s_at	SH3GLB1	-2.12451	0.0107672
219734_at	SIDT1	-2.03235	0.00900962
202433_at	SLC35B1	-2.18175	0.000265894
218237_s_at	SLC38A1	-2.48995	0.00339082
201663_s_at	SMC4	-2.84943	0.0409319
218781_at	SMC6	-2.7091	0.0135544
215905_s_at	SNRNP40	-2.32587	0.00579568
215223_s_at	SOD2	-2.23668	0.041555
201418_s_at	SOX4	-2.31733	0.01016
201858_s_at	SRGN	-3.11855	0.0125103
219204_s_at	SRR	-2.85073	0.000231529
202294_at	STAG1	-2.22955	0.044817
219686_at	STK32B	-2.06789	0.00424161
212572_at	STK38L	-2.11179	0.0306728
218763_at	STX18	-2.13635	0.000779493
212631_at	STX7	-2.2712	0.0441707
218321_x_at	STYXL1	-2.19271	0.000909902
202813_at	TARBP1	-2.18025	0.0119248
209813_x_at	TARP	-3.35303	0.000849732
211144_x_at	TARP /// TRGC2	-2.78542	0.000198345
215806_x_at	TARP /// TRGC2	-2.90473	0.0015038
216920_s_at	TARP /// TRGC2	-2.32188	0.00240108
201804_x_at	TBCB	-2.01494	0.0197199
211759_x_at	TBCB	-2.28488	0.00995646
216194_s_at	TBCB	-2.02211	0.0253818
212387_at	TCF4	-2.09781	0.00624606
39318_at	TCL1A	-5.42225	0.0345911
209995_s_at	TCL1A	-5.99551	0.0485235
209338_at	TFCP2	-2.25087	0.0157975
201506_at	TGFBI	-7.60591	7.63729e-05
212665_at	TIPARP	-3.32369	0.0003986
213550_s_at	TMCO6	-3.65954	0.0132907
218477_at	TMEM14A	-2.0074	0.0192913
218856_at	TNFRSF21	-2.05346	0.0103196
217853_at	TNS3	-2.06475	0.0163858
210052_s_at	TPX2	-2.06221	0.00635166
200892_s_at	TRA2B	-2.1173	0.0107418
217959_s_at	TRAPPC4	-2.29515	0.034408
211796_s_at	TRBC1 /// TRBC2	-2.32274	0.00820952
202241_at	TRIB1	-2.40606	0.000191878
221044_s_at	TRIM34 /// TRIM6-TRIM34	-2.05019	0.0398223
209012_at	TRIO	-2.88958	0.0171794
202642_s_at	TRRAP	-3.61112	0.000156855
208763_s_at	TSC22D3	-2.53822	0.0166066
201504_s_at	TSN	-2.36521	0.0100696
218156_s_at	TSR1	-2.12016	0.047599
209026_x_at	TUBB	-2.10693	0.00219948
216609_at	TXN	-2.04608	0.0165697
217825_s_at	UBE2J1	-2.063	0.0016134
217826_s_at	UBE2J1	-2.9495	0.0116235
204881_s_at	UGCG	-3.16676	0.0268339
212144_at	UNC84B	-2.1227	0.00586248
221731_x_at	VCAN	-2.97137	0.0263289
201426_s_at	VIM	-2.07795	0.00480357
202250_s_at	WDR42A	-2.03356	0.00117358
221531_at	WDR61	-2.1193	0.000533645
208643_s_at	XRCC5	-2.25142	0.0203428
208627_s_at	YBX1	-2.77038	4.05999e-05
212655_at	ZCCHC14	-2.93316	0.00586284
220261_s_at	ZDHHC4	-2.0371	0.00382892
208174_x_at	ZRSR2	-2.1275	0.000144791
207688_s_at		-4.48481	9.64212e-06
215450_at		-3.48638	0.00131456
217521_at		-2.96255	2.10354e-05
221995_s_at		-2.21054	3.67957e-05
209869_at	ADRA2A	2.87379	0.0100994
214707_x_at	ALMS1	2.00085	0.0048158
220940_at	ANKRD36B	2.1216	0.0300455
201242_s_at	ATP1B1	3.80029	0.019004
214594_x_at	ATP8B1	2.68332	0.0108239
213348_at	CDKN1C	2.36671	0.0230786
205370_x_at	DBT	2.17474	0.00737434
205001_s_at	DDX3Y	6.20552	0.0468023
205033_s_at	DEFA1 /// DEFA3 /// LOC728358	15.1211	5.39247e-05
207269_at	DEFA4	5.75084	0.00650687
38157_at	DOM3Z	2.0662	0.00185411
221884_at	EVI1	2.08829	0.00450337
220720_x_at	FAM128B	2.62205	0.00834166
219602_s_at	FAM38B	2.86495	0.00693113
31874_at	GAS2L1	2.31681	0.0268796
207389_at	GP1BA	2.6644	0.00102302
212070_at	GPR56	2.34371	0.0122641
209458_x_at	HBA1 /// HBA2	3.67839	0.0342097
214414_x_at	HBA1 /// HBA2	5.32956	0.0423293
216229_x_at	HCG2P7	2.06278	0.0183201
210387_at	HIST1H2BG	3.51757	0.0423094
216497_at	HNRNPA1 /// HNRNPA1L2 /// HNRPA1L-2 /// HNRPA1P5 /// LOC100128701 /// LOC100128836 /// LOC120364 /// LOC391670 /// LOC402112 /// LOC642817 /// LOC643033 /// LOC644037 /// LOC645001 /// LOC728170 /// LOC728643 /// LOC728732 /// LOC729102 /// LOC729366 /// LOC730246 /// RP11-569O4.6	2.06472	0.00378339
211005_at	LAT /// SPNS1	2.78639	0.00101941
209894_at	LEPR	3.28799	0.0207931
211996_s_at	LOC100132247 /// LOC613037 /// NPIPL3	2.16776	0.0425058
202018_s_at	LTF	3.09444	0.0349524
220459_at	MCM3APAS	2.01605	0.00518713
221192_x_at	MFSD11	2.05807	0.0128965
209757_s_at	MYCN	3.40348	0.0276817
210556_at	NFATC3	2.0689	0.000756461
209289_at	NFIB	3.38063	0.0017464
209290_s_at	NFIB	4.77789	0.000400029
215338_s_at	NKTR	2.38789	0.0154087
204621_s_at	NR4A2	2.41252	0.0393223
212148_at	PBX1	2.05272	0.0128237
219737_s_at	PCDH9	2.44813	0.0222901
219738_s_at	PCDH9	2.5719	0.0088952
206390_x_at	PF4	2.88093	0.019437
215179_x_at	PGF	2.25389	0.00384077
40446_at	PHF1	2.07437	0.00099
220113_x_at	POLR1B	3.38521	0.00508707
215067_x_at	PRDX2	2.14255	0.0332319
211743_s_at	PRG2	4.8206	0.0444669
207808_s_at	PROS1	2.68817	0.0248887
205128_x_at	PTGS1	2.25574	0.00146067
215813_s_at	PTGS1	2.18828	0.00680566
37793_r_at	RAD51L3	2.90441	0.00273715
204402_at	RHBDD3	2.0872	0.0112545
215588_x_at	RIOK3	2.35758	0.0118898
207953_at	RP5-886K2.1	2.15922	0.0300941
215208_x_at	RPL35A	2.12298	0.0376295
220232_at	SCD5	2.62312	0.0497904
206049_at	SELP	2.67642	0.00137329
37462_i_at	SF3A2	2.3079	0.0310344
220796_x_at	SLC35E1	2.01921	0.00962575
201321_s_at	SMARCC2	2.10013	0.00499798
213827_at	SNX26	2.14128	0.0101678
206283_s_at	TAL1	2.05553	0.00856517
212457_at	TFE3	2.82132	4.04814e-05
210800_at	TIMM8A	2.3406	0.0181055
201148_s_at	TIMP3	2.02133	0.0448881
221748_s_at	TNS1	2.23536	0.0182204
210512_s_at	VEGFA	2.71273	0.0117876
202112_at	VWF	2.6105	0.0116368
219538_at	WDR5B	2.3338	0.0129986
206067_s_at	WT1	3.14626	0.00369831
207598_x_at	XRCC2	2.29816	0.0362375
208137_x_at	ZNF611	2.1749	0.011701
207730_x_at		2.45545	0.0188455
208238_x_at		2.01996	0.0186828
208246_x_at		2.06225	0.015024
213156_at		2.62473	0.0220714
213757_at		2.37073	0.0377349
215373_x_at		2.05232	0.0253928
215604_x_at		2.20429	0.0131955
215609_at		2.04351	0.0397637
215628_x_at		2.10895	0.00985131
216858_x_at		2.25167	0.0112028
217679_x_at		2.42112	0.0197688
222366_at		2.04595	0.024873
